# Supplementary material for: A mussel-inspired film for adhesion to wet buccal tissue and efficient buccal drug delivery
Source: Nat Commun. 2021 Mar 16;12:1689. doi: 10.1038/s41467-021-21989-5 (PMC7966365; doi:10.1038/s41467-021-21989-5)
Supplement: Supplementary file 1 — Supplementary Information [file 41467_2021_21989_MOESM1_ESM.pdf]

## Supplementary Information

### A mussel-inspired film for adhesion to wet buccal tissue and efficient buccal drug delivery

#### Authors:

Shanshan Hu<sup>1,2</sup>, Xibo Pei<sup>1</sup>, Lunliang Duan<sup>3</sup>, Zhou Zhu<sup>1</sup>, Yanhua Liu<sup>1</sup>, Junyu Chen<sup>1</sup>, Tao Chen<sup>2</sup>, Ping Ji<sup>2</sup>, Qianbing Wan<sup>1\*</sup> & Jian Wang<sup>1\*</sup>

#### Affiliations:

<sup>1</sup>State Key Laboratory of Oral Diseases, National Clinical Research Center for Oral Diseases, Department of Prosthodontics, West China Hospital of Stomatology, Sichuan University, Chengdu, China. <sup>2</sup>Stomatological Hospital of Chongqing Medical University, Chongqing Key Laboratory of Oral Diseases and Biomedical Sciences, Chongqing Municipal Key Laboratory of Oral Biomedical Engineering of Higher Education, Chongqing, China. <sup>3</sup>National Engineering Research Center for Inland Waterway Regulation, Chongqing Jiaotong University, Chongqing, China.

These authors contributed equally: Shanshan Hu, Xibo Pei.

\*Corresponding Authors. e-mail: [champion@scu.edu.cn](mailto:champion@scu.edu.cn); [ferowang@hotmail.com](mailto:ferowang@hotmail.com).

## Supplementary figures

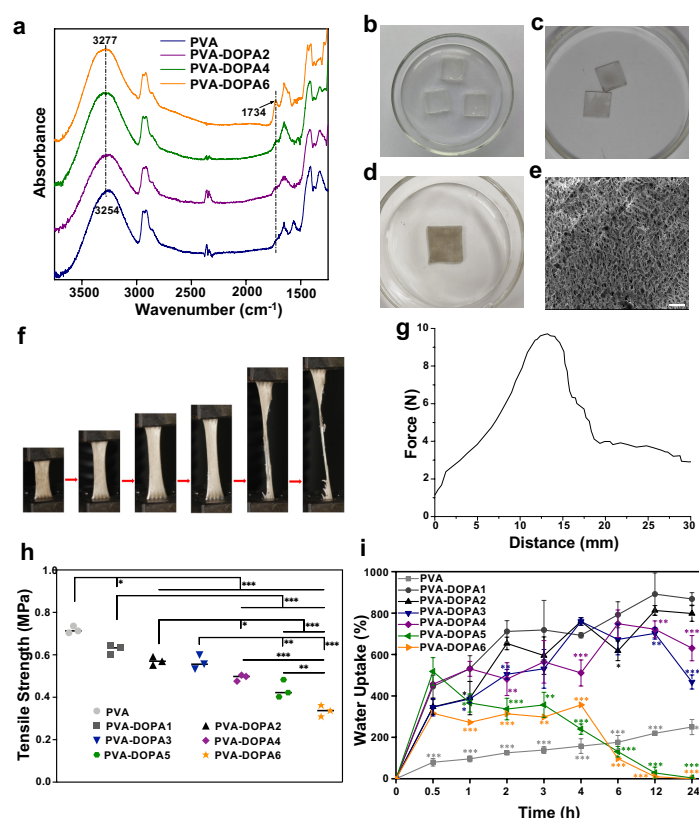

**Supplementary Figure 1. Characterization of PVA-DOPA films.** (a) FTIR spectra of PVA-DOPA polymers with different DOPA contents. PVA: poly(vinyl alcohol), DOPA: 3,4-dihydroxy-D-phenylalanine. (b) Photograph of ethyl cellulose protective cap. (c) Photograph of dry PVA-DOPA mucoadhesive film. (d) Photograph of PVA-DOPA mucoadhesive film after hydration. (e) SEM image of PVA-DOPA film. Scale bar: 200  $\mu\text{m}$  (f) Tensile strength testing of PVA-DOPA3 film. (g) Representation of the stress-distance curve, during the tensile tests, for PVA-DOPA3 film. (h) Tensile strength of PVA-DOPA films with different DOPA contents.  $n = 3$  independent samples per group;  $*P < 0.05$ ;  $**P < 0.01$ ;  $***P < 0.001$ . (i) Swelling behavior of PVA-DOPA films different DOPA contents as a function of time.  $n = 3$  independent samples per group;  $*P < 0.05$ ;  $**P < 0.01$ ;  $***P < 0.001$  vs PVA-DOPA1 group. All data are Mean  $\pm$  S.D. Statistics was calculated by one-way ANOVA followed by Tukey's post-test. Exact  $P$  values are given in the Source Data file. Source data are provided as a Source data file.

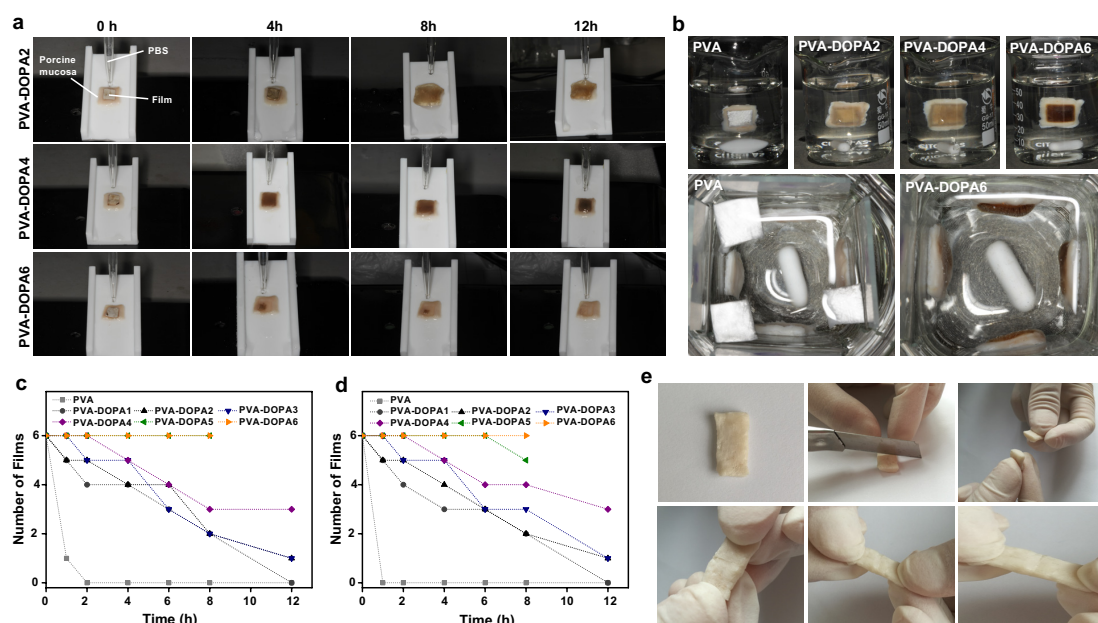

**Supplementary Figure 2. Residence time and self-healing properties of PVA-DOPA films.** (a) Experimental set-up for in vitro residence time measurement using the flow-through method. PVA: poly(vinyl alcohol), DOPA: 3,4-dihydroxy-D-phenylalanine. (b) Experimental set-up for in vitro residence time measurement using the rotating disc method. (c) The number of different PVA-DOPA films left on the porcine buccal mucosa as a function of time using the flow-through method. (d) The number of different PVA-DOPA films left on the porcine buccal mucosa as a function of time using the rotating disc method. (e) Photographs of self-healing properties of PVA-DOPA film.

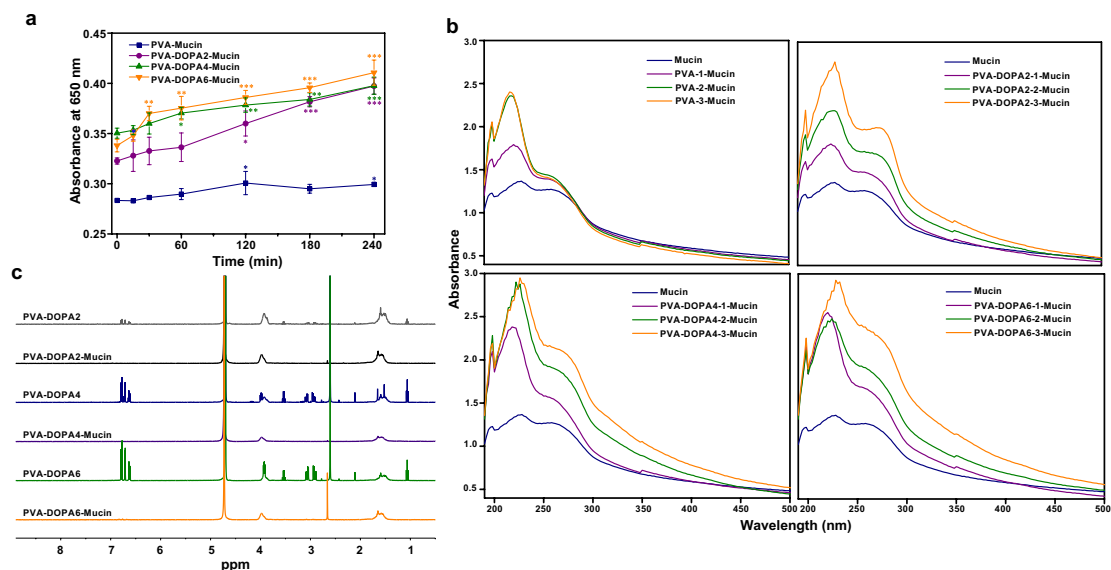

**Supplementary Figure 3. Interactions of PVA-DOPA films with mucin.** (a) Variation of turbidity of different PVA-DOPA-Mucin mixtures as a function of time. PVA: poly(vinyl alcohol), DOPA: 3,4-dihydroxy-D-phenylalanine.  $n = 3$  independent samples per group;  $*P < 0.05$ ;  $**P < 0.01$ ;  $***P < 0.001$  vs value at 0 h. All data are Mean  $\pm$  S.D. Statistics was calculated by one-way ANOVA followed by Tukey's post-test. Exact  $P$  values are given in the Source Data file. (b) UV-vis absorbance spectra of different concentrations (0.05, 0.10, and 0.15 mg/ml) of PVA, PVA-DOPA2, PVA-DOPA4, and PVA-DOPA6 after mixed with mucin suspension. (c) Comparison of  $^1\text{H}$ -NMR spectra of different PVA-DOPA polymers before and after mixed with mucin suspension. Source data are provided as a Source data file.

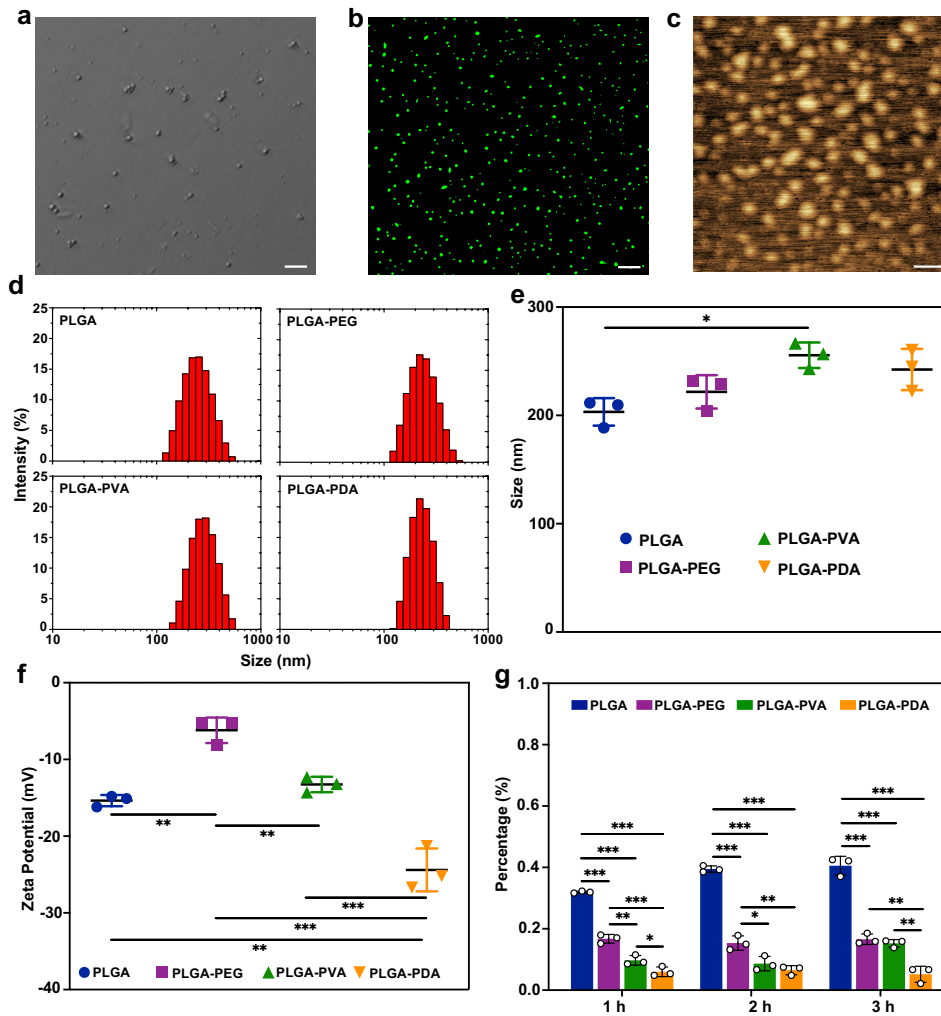

**Supplementary Figure 4. Characterization of different PLGA NPs.** (a) Optical micrograph of PLGA NPs. Sale bar: 2  $\mu\text{m}$ . (b) Fluorescence image of PLGA NPs. Sale bar: 2  $\mu\text{m}$ . (c) AFM image of PLGA NPs. Sale bar: 200 nm. (d) Size distribution of PLGA, PLGA-PEG, PLGA-PVA, and PLGA-PDA NPs. PLGA: poly(lactic-co-glycolic acid), PEG: poly(ethylene glycol), PVA: poly(vinyl alcohol), PDA: polydopamine. (e) Particle size of PLGA, PLGA-PEG, PLGA-PVA, and PLGA-PDA NPs.  $*P = 0.012$ . (f) Zeta-potential of PLGA, PLGA-PEG, PLGA-PVA, and PLGA-PDA NPs.  $**P < 0.01$ ;  $***P < 0.001$ . (g) Percentage of PLGA, PLGA-PEG, PLGA-PVA, and PLGA-PDA NPs interacted with rose bengal solution.  $*P < 0.05$ ;  $**P < 0.01$ ;  $***P < 0.001$ . All data are Mean  $\pm$  S.D.  $n = 3$  independent samples per group. Statistics was calculated by one-way ANOVA followed by Tukey's post-test. Exact  $P$  values are given in the Source Data file. Source data are provided as a Source data file.

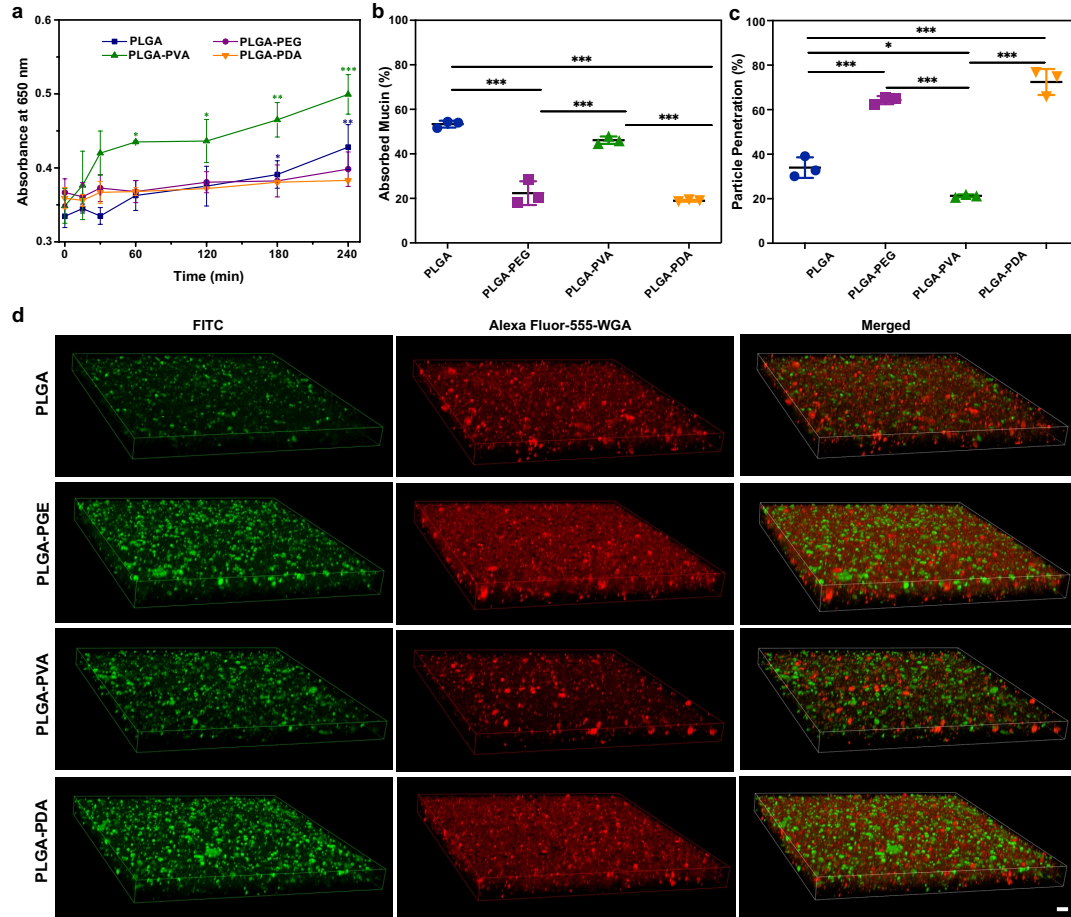

**Supplementary Figure 5. Mucus-penetrating properties of different PLGA NPs.** (a) Variation of turbidity of different NPs-Mucin mixtures as a function of time. PLGA: poly(lactic-co-glycolic acid), PEG: poly(ethylene glycol), PVA: poly(vinyl alcohol), PDA: polydopamine.  $*P < 0.05$ ;  $**P < 0.01$ ;  $***P < 0.001$  vs value at 0 h. (b) Percentage of absorbed PLGA, PLGA-PEG, PLGA-PVA, and PLGA-PDA NPs onto mucin particles.  $***P < 0.001$ . (c) Percentage of penetrated NPs across mucus layer in an agarose gel assay after 6 h.  $*P = 0.016$ ;  $***P < 0.001$  (d) Z-stacks of PLGA, PLGA-PEG, PLGA-PVA, and PLGA-PDA NPs diffusion (green) in mucin suspension (red). Scale bar: 50  $\mu\text{m}$ . All data are Mean  $\pm$  S.D.  $n = 3$  independent samples per group. Statistics was calculated by one-way ANOVA followed by Tukey's post-test. Exact  $P$  values are given in the Source Data file. Source data are provided as a Source data file.

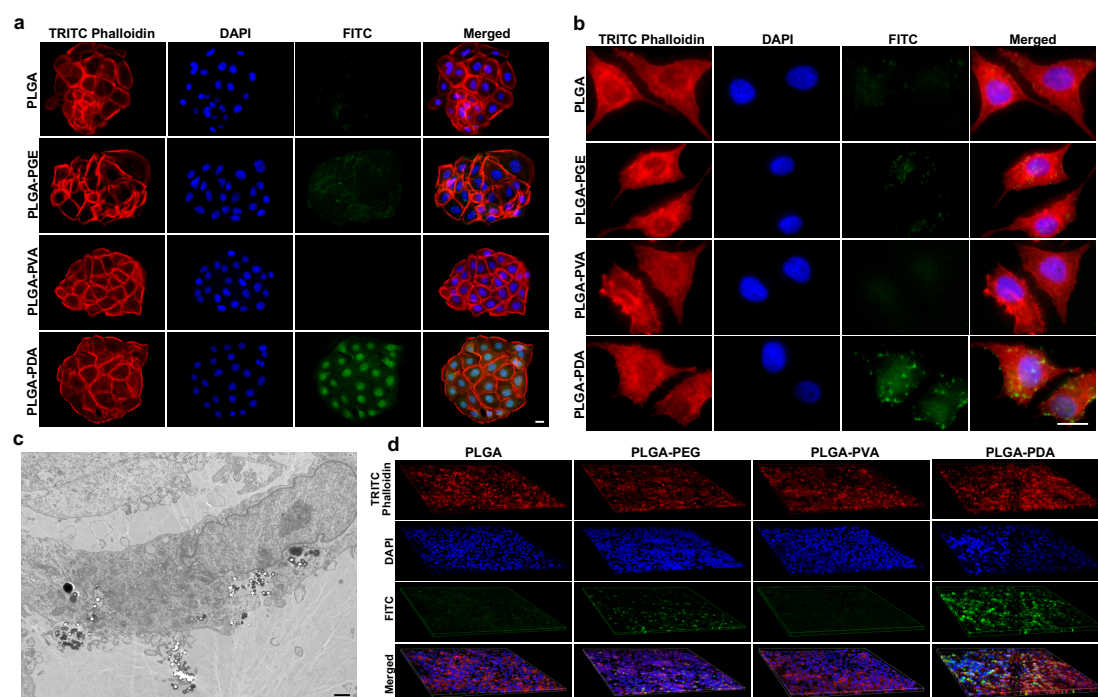

**Supplementary Figure 6. Cellular uptake of different PLGA NPs in vitro.** (a) Fluorescence image of cellular uptake of different NPs in HOK after incubation for 2 h. Scale bar: 20  $\mu\text{m}$ . PLGA: poly(lactic-co-glycolic acid), PEG: poly(ethylene glycol), PVA: poly(vinyl alcohol), PDA: polydopamine. (b) Fluorescence image of cellular uptake of different NPs in HGECs after incubation for 2 h. Scale bar: 20  $\mu\text{m}$ . (c) TEM images of cellular internalization process of PLGA-PDA NPs in HOK after incubation for 2 h. Scale bar: 1  $\mu\text{m}$ . (d) 3D images of the cellular transport of NPs in the TR146 cell monolayer. Scale bar: 100  $\mu\text{m}$ .  $n = 3$  independent cells per group.

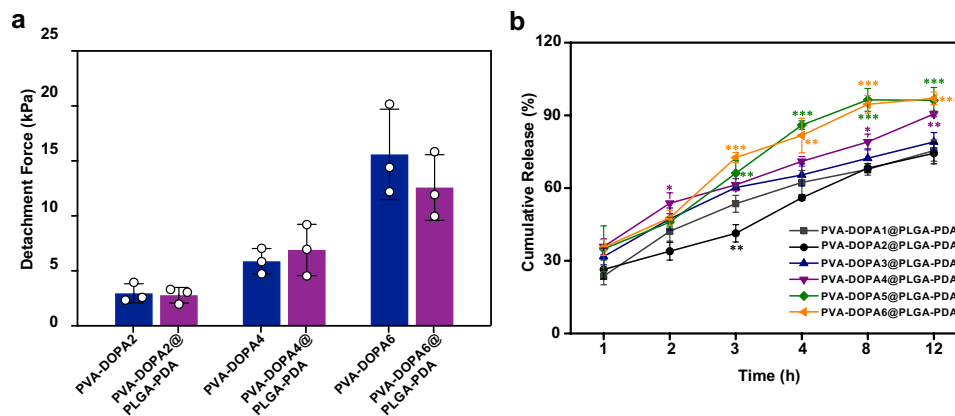

**Supplementary Figure 7. Detachment force and release profile of PVA-DOPA@NPs films after incorporated with PLGA-PDA NPs.** (a) Comparison of detachment force of different PVA-DOPA films before and after incorporated with NPs. PVA: poly(vinyl alcohol), DOPA: 3,4-dihydroxy-D-phenylalanine, PLGA: poly(lactic-co-glycolic acid), PDA: polydopamine. (b) Release profile of NPs from PVA-DOPA@PLGA-PDA films with different DOPA contents as a function of time. \* $P < 0.05$ ; \*\* $P < 0.01$ ; \*\*\* $P < 0.001$  vs PVA-DOPA1@PLGA-PDA group. All data are Mean  $\pm$  S.D.  $n = 3$  independent samples per group. Statistics was calculated by one-way ANOVA followed by Tukey's post-test. Exact  $P$  values are given in the Source Data file. Source data are provided as a Source data file.

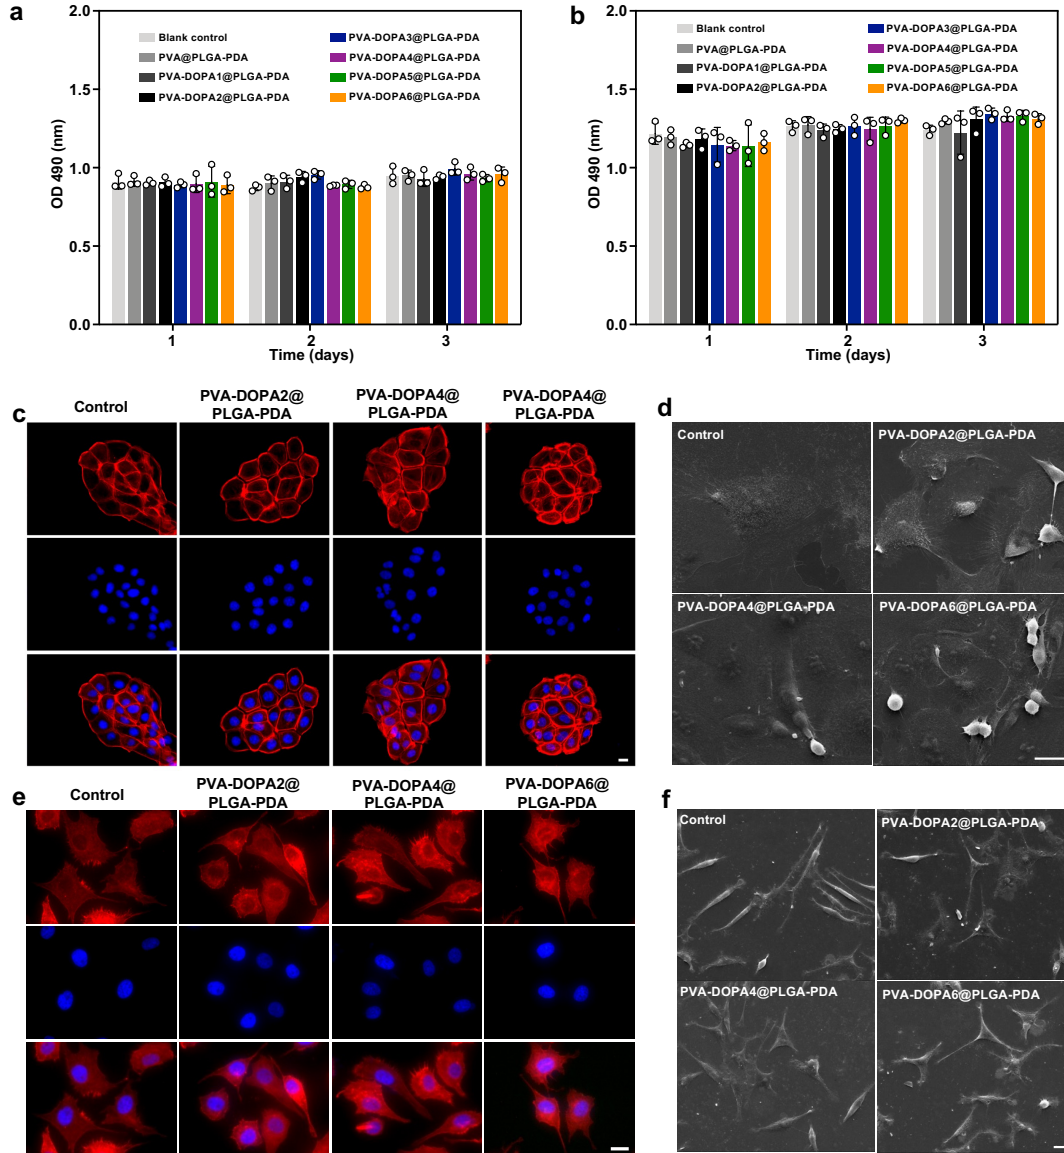

**Supplementary Figure 8. In vitro biosafety evaluation of PVA-DOPA@PLGA-PDA film.** (a) (b) CCK-8 assay of HOK and HGECS after incubated with different films for 1, 2, and 3 days, respectively. PVA: poly(vinyl alcohol), DOPA: 3,4-dihydroxy-D-phenylalanine, PLGA: poly(lactic-co-glycolic acid), PDA: polydopamine. (c) Fluorescence image of cell attachment of HOK after incubated with different PVA-DOPA@NPs films for 24 h. Scale bar: 20  $\mu$ m. (d) SEM image of cell attachment of HOK after incubated with different PVA-DOPA@NPs films for 24 h. Scale bar: 20  $\mu$ m. (e) Fluorescence image of cell attachment of HGECS after incubated with different PVA-DOPA@NPs films for 24 h. Scale bar: 20  $\mu$ m. (f) SEM image of cell attachment of HGECS after incubated with different PVA-DOPA@NPs films for 24 h. Scale bar: 20  $\mu$ m. All data are Mean  $\pm$  S.D.  $n = 3$  independent cells per group. Statistics was calculated by one-way ANOVA followed by Tukey's post-test. Source data are provided as a Source data file.

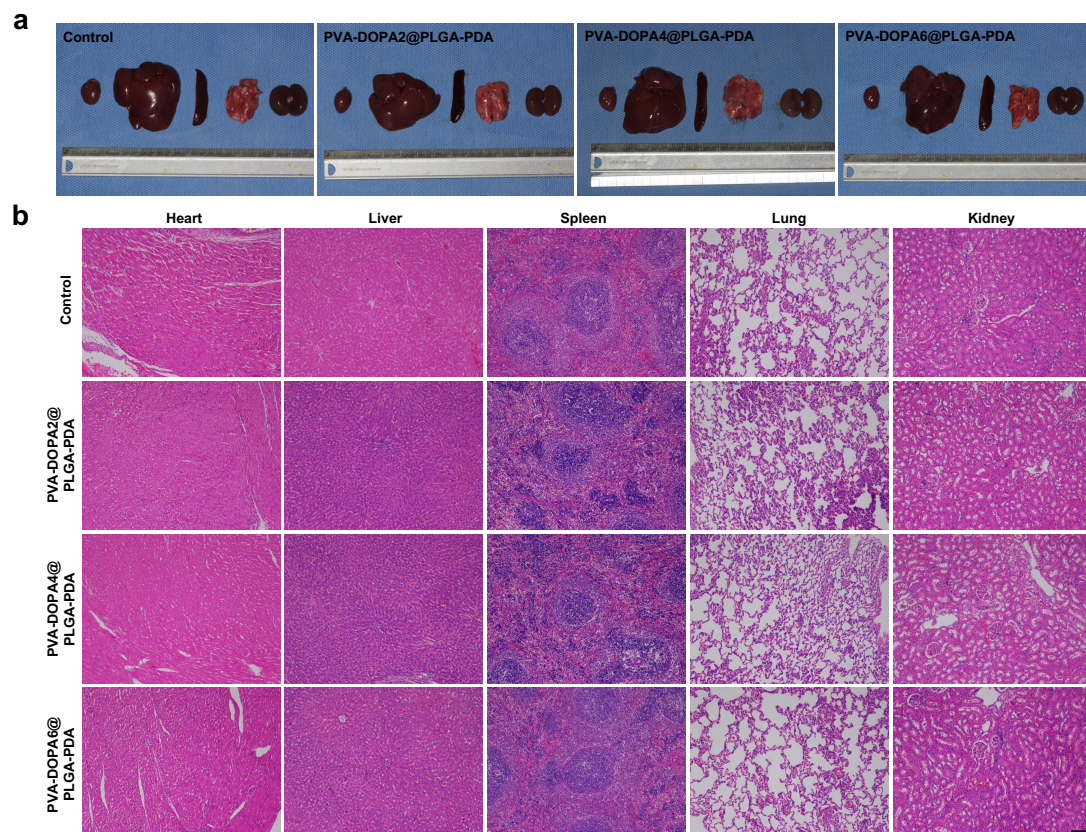

**Supplementary Figure 9. In vivo biosafety evaluation of PVA-DOPA@PLGA-PDA film.** (a) Photographs of rat major organs (heart, liver, spleen, lung, and kidney) after subcutaneously implanted with different films in the backs of SD rats for 7 days. PVA: poly(vinyl alcohol), DOPA: 3,4-dihydroxy-D-phenylalanine, PLGA: poly(lactic-co-glycolic acid), PDA: polydopamine. (b) H&E staining of major organs (heart, liver, spleen, lung, and kidney) after subcutaneously implanted with different films in the backs of SD rats for 7 days. Scale bars: 100  $\mu\text{m}$ .  $n = 3$  animals per group.

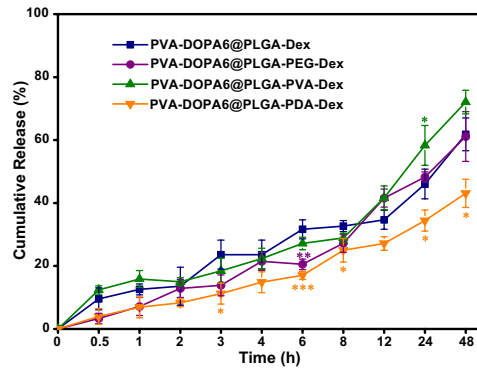

**Supplementary Figure 10.** In vitro release profile of Dex from PVA-DOPA6@NPs film incorporated with different NPs as a function of time. PVA: poly(vinyl alcohol), DOPA: 3,4-dihydroxy-D-phenylalanine, PLGA: poly(lactic-co-glycolic acid), PEG: poly(ethylene glycol), PVA: poly(vinyl alcohol), PDA: polydopamine. \* $P < 0.05$ ; \*\* $P = 0.001$ ; \*\*\* $P < 0.001$  vs PVA-DOPA6@PLGA-Dex group. All data are Mean  $\pm$  S.D.  $n = 3$  independent samples per group. Statistics was calculated by one-way ANOVA followed by Tukey's post-test. Exact  $P$  values are given in the Source Data file. Source data are provided as a Source data file.

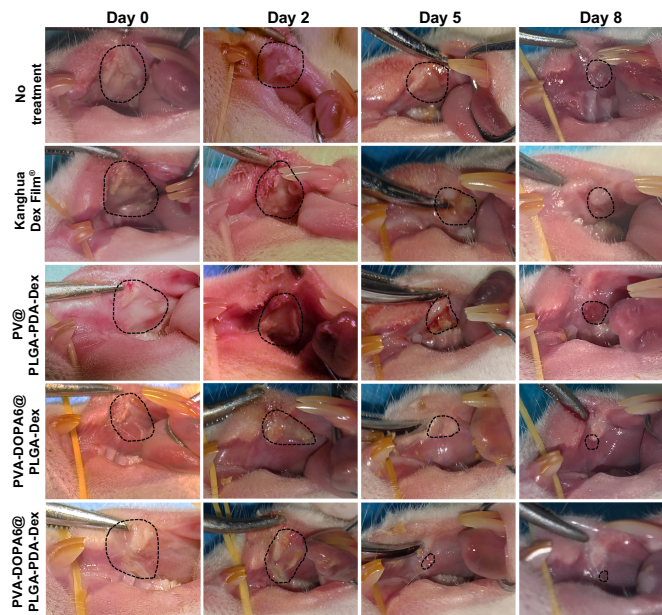

**Supplementary Figure 11.** Gross inspection of buccal mucosa ulcers in SD rats treated with Kanghua Dex Film®, PVA@PLGA-PDA-Dex, PVA-DOPA6@PLGA-Dex, PVA-DOPA6@PLGA-PDA-Dex film, and no treatment at day 0, 2, 5 and 8. Dex: dexamethasone, PVA: poly(vinyl alcohol), DOPA: 3,4-dihydroxy-D-phenylalanine, PLGA: poly(lactic-co-glycolic acid), PDA: polydopamine.  $n = 3$  animals per group. (group 2)

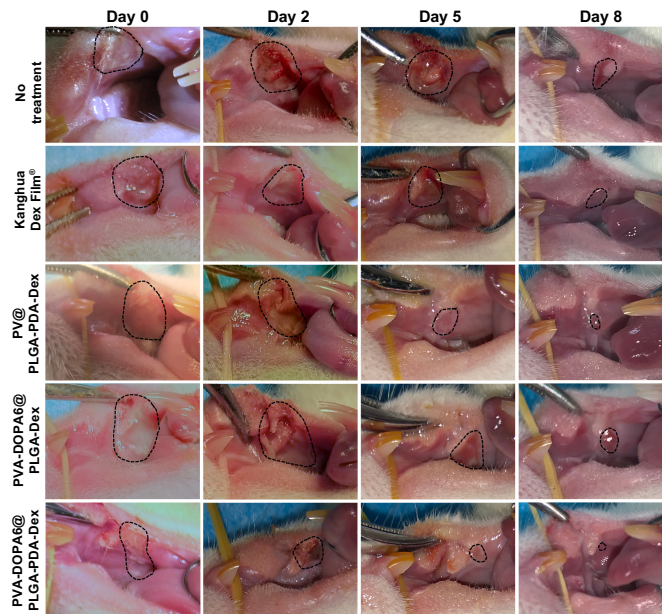

**Supplementary Figure 12.** Gross inspection of buccal mucosa ulcers in SD rats treated with Kanghua Dex Film<sup>®</sup>, PVA@PLGA-PDA-Dex, PVA-DOPA6@PLGA-Dex, PVA-DOPA6@PLGA-PDA-Dex film, and no treatment at day 0, 2, 5 and 8. Dex: dexamethasone, PVA: poly(vinyl alcohol), DOPA: 3,4-dihydroxy-D-phenylalanine, PLGA: poly(lactic-co-glycolic acid), PDA: polydopamine.  $n = 3$  animals per group. (group 3)

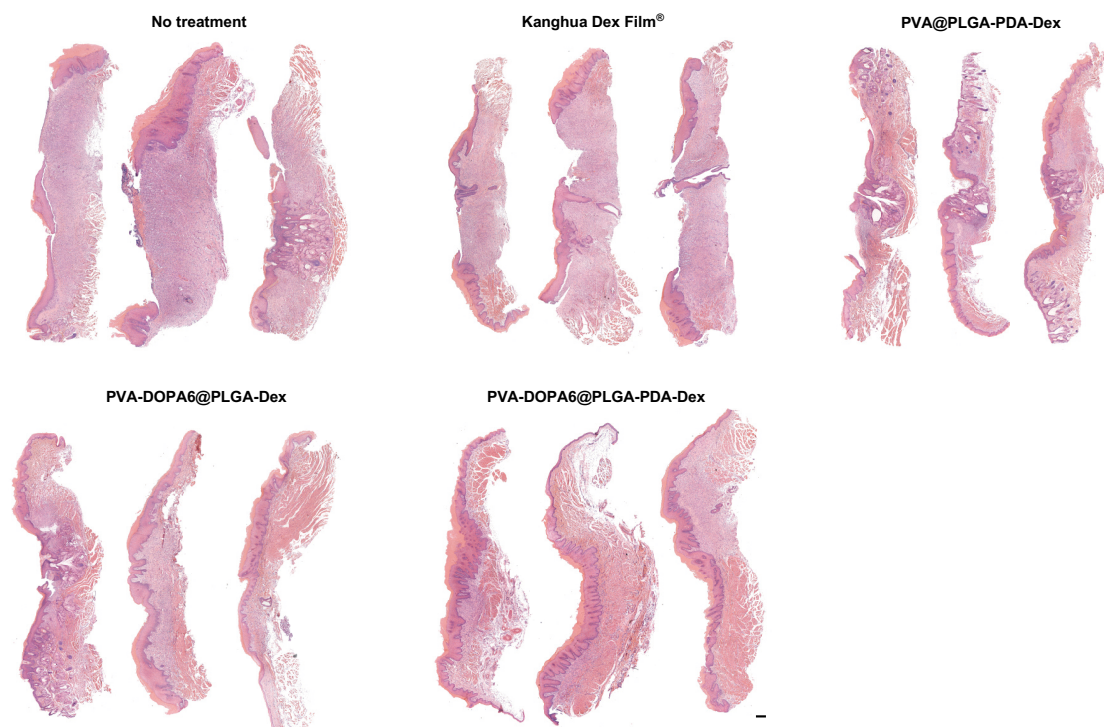

**Supplementary Figure 13.** H&E staining images of cross-section of regenerated oral ulcer in Sprague Dawley rats treated with Kanghua Dex Film<sup>®</sup>, PVA@PLGA-PDA-Dex, PVA-DOPA6@PLGA-Dex, PVA-DOPA6@PLGA-PDA-Dex film, and no treatment at day 8. Scale bar: 200  $\mu\text{m}$ .  $n = 3$  animals per group. (group 1-3)

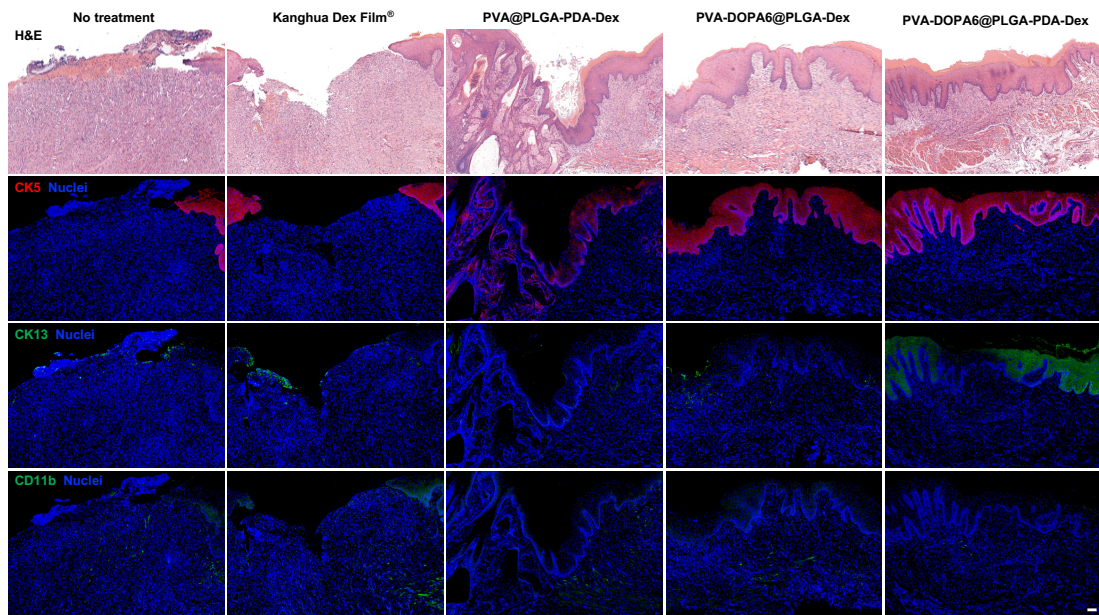

**Supplementary Figure 14.** H&E staining and immunohistochemistry staining of anti-keratin5 (CK5, red), anti-keratin13 (CK13, green), and anti-CD11b (CD11b, green) of regenerated oral ulcer at day 8. Nuclei (blue) was stained with DAPI. Scale bar: 100  $\mu$ m.  $n = 3$  animals per group. (group 2)

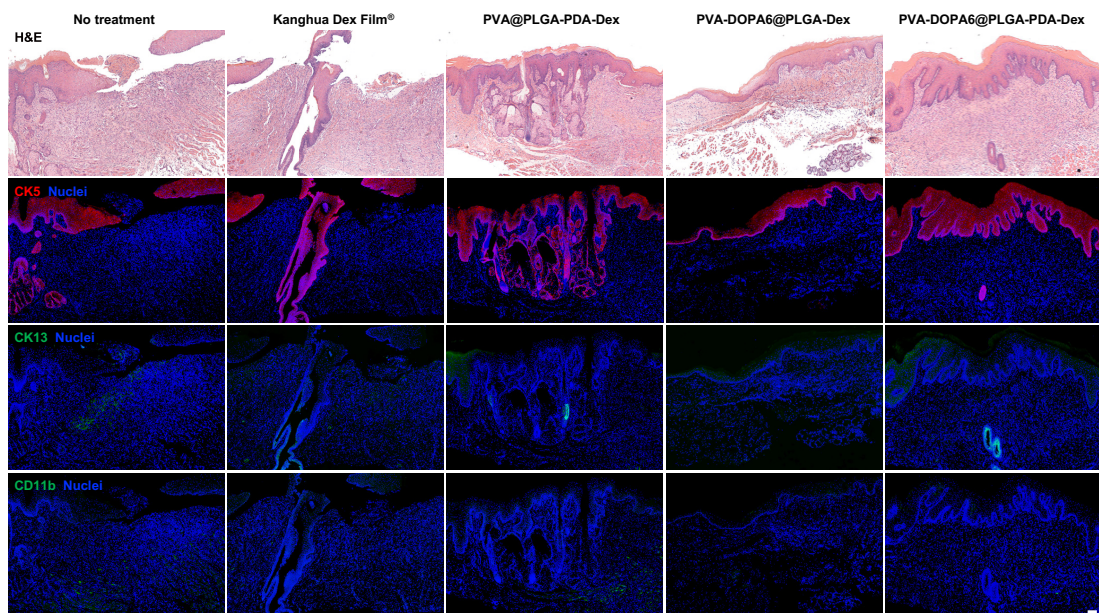

**Supplementary Figure 15.** H&E staining and immunohistochemistry staining of anti-keratin5 (CK5, red), anti-keratin13 (CK13, green), and anti-CD11b (CD11b, green) of regenerated oral ulcer at day 8. Nuclei (blue) was stained with DAPI. Scale bar: 100  $\mu$ m.  $n = 3$  animals per group. (group 3)

## Supplementary Tables

**Supplementary Table 1.** Degree of substitution of catechol and mass fraction of catechol in PVA-DOPA conjugates calculated from the results of  $^1\text{H-NMR}$  and UV-vis spectra.

| Samples   | Molar ratio of PVA/DOPA | Degree of substitution of catechol calculated from $^1\text{H-NMR}$ (%) | Mass fraction of catechol calculated from UV-vis (wt%) |
|-----------|-------------------------|-------------------------------------------------------------------------|--------------------------------------------------------|
| PVA-DOPA1 | 6:1                     | 4.7                                                                     | 16.0                                                   |
| PVA-DOPA2 | 6:2                     | 9.3                                                                     | 27.9                                                   |
| PVA-DOPA3 | 6:3                     | 28.0                                                                    | 35.0                                                   |
| PVA-DOPA4 | 6:4                     | 41.3                                                                    | 42.2                                                   |
| PVA-DOPA5 | 6:5                     | 57.3                                                                    | 61.5                                                   |
| PVA-DOPA6 | 6:6                     | 64.6                                                                    | 72.0                                                   |

**Supplementary Table 2.** Thickness and surface pH of different PVA-DOPA films. Data are presented as the means  $\pm$  standard deviations (SDs). ( $n = 3$  independent samples per group)

| Samples   | Thickness (mm)  | Surface pH     |
|-----------|-----------------|----------------|
| PVA       | 1.06 $\pm$ 0.03 | 6.8 $\pm$ 0.06 |
| PVA-DOPA1 | 1.04 $\pm$ 0.03 | 6.6 $\pm$ 0.08 |
| PVA-DOPA2 | 1.00 $\pm$ 0.04 | 6.6 $\pm$ 0.05 |
| PVA-DOPA3 | 0.99 $\pm$ 0.05 | 6.7 $\pm$ 0.05 |
| PVA-DOPA4 | 1.00 $\pm$ 0.06 | 6.7 $\pm$ 0.08 |
| PVA-DOPA5 | 1.04 $\pm$ 0.06 | 6.6 $\pm$ 0.08 |
| PVA-DOPA6 | 1.03 $\pm$ 0.06 | 6.7 $\pm$ 0.12 |

**Supplementary Table 3.** Heat of fusion ( $\Delta H_m$ ) of different PVA-DOPA after interacted with mucin.

| Samples         | $\Delta H_m/\text{Jg}^{-1}$ |
|-----------------|-----------------------------|
| PVA-Mucin       | 4.26                        |
| PVA-DOPA1-Mucin | 26.80                       |
| PVA-DOPA2-Mucin | 35.69                       |
| PVA-DOPA3-Mucin | 46.09                       |
| PVA-DOPA4-Mucin | 59.18                       |
| PVA-DOPA5-Mucin | 73.58                       |
| PVA-DOPA6-Mucin | 123.37                      |

**Supplementary Table 4.** Pharmacokinetic parameters of Dex after administrated with different formulations of Dex via oral or buccal route in Sprague Dawley rats. Data are presented as the means  $\pm$  standard deviations (SDs). ( $n = 3$  animals)

| Samples                             | $T_{\max}$ (h) | $C_{\max}$ (ng/ml) | $T_{1/2}$ (h)  | AUC <sub>0-24</sub><br>(ng/ml*h) |
|-------------------------------------|----------------|--------------------|----------------|----------------------------------|
| Dex (oral)                          | 1.00           | 13.43 $\pm$ 4.12   | 2.1 $\pm$ 0.2  | 45.18 $\pm$ 11.48                |
| PLGA-PDA-Dex NPs (oral)             | 1.00           | 6.94 $\pm$ 0.68    | 4.1 $\pm$ 2.7  | 64.70 $\pm$ 1.52                 |
| PVA-DOPA@PLGA-Dex film (buccal)     | 5.3 $\pm$ 2.3  | 9.01 $\pm$ 2.38    | 8.9 $\pm$ 2.7  | 78.12 $\pm$ 8.23                 |
| PVA-DOPA@PLGA-PDA-Dex film (buccal) | 12.0           | 11.62 $\pm$ 3.36   | 20.7 $\pm$ 0.7 | 160.17 $\pm$ 43.86               |

$T_{\max}$ : time at which  $C_{\max}$  is attained;  $C_{\max}$ : maximum plasma concentration;  $T_{1/2}$ : elimination half-life; AUC: area under concentration-time curve.
